# Supplementary material for: Engineering the solid electrolyte interphase for enhancing high-rate cycling and temperature adaptability of lithium-ion batteries
Source: Royal Society of Chemistry journal article supplement (doi:10.1039/d4sc07916g), 2025-01-01
Supplement: d4sc07916g1.pdf [file d4sc07916g1.pdf]

## Supporting Information

# Engineering the Solid Electrolyte Interphase for Enhancing High-Rate Cycling and Temperature Adaptability of Lithium-Ion Batteries

*Zhongming Wang<sup>1</sup>, Zhiyuan He<sup>1</sup>, Zhongsheng Wang<sup>1</sup>, Kecheng Long<sup>3</sup>, Jixu Yang<sup>1</sup>, Shaozhen Huang<sup>1</sup>, Zhibin Wu<sup>1</sup>, Lin Mei<sup>1\*</sup>, Libao Chen<sup>1,2\*</sup>*

E-mail: meilin@csu.edu.cn, lbchen@csu.edu.cn

1 State Key Laboratory of Powder Metallurgy, Central South University, Changsha, 410083, P. R. China.

2 National Energy Metal Resources and New Materials Key Laboratory, Central South University, Changsha, 410083, P. R. China.

3 School of Materials Science and Engineering, Xiangtan University, Xiangtan, Hunan, 411105 China

**Keywords:** Lithium-ion Battery; Electrolyte Additive; Lithium Nonfluoro-1-Butanesulfonate; Electrode/Electrolyte Interface.

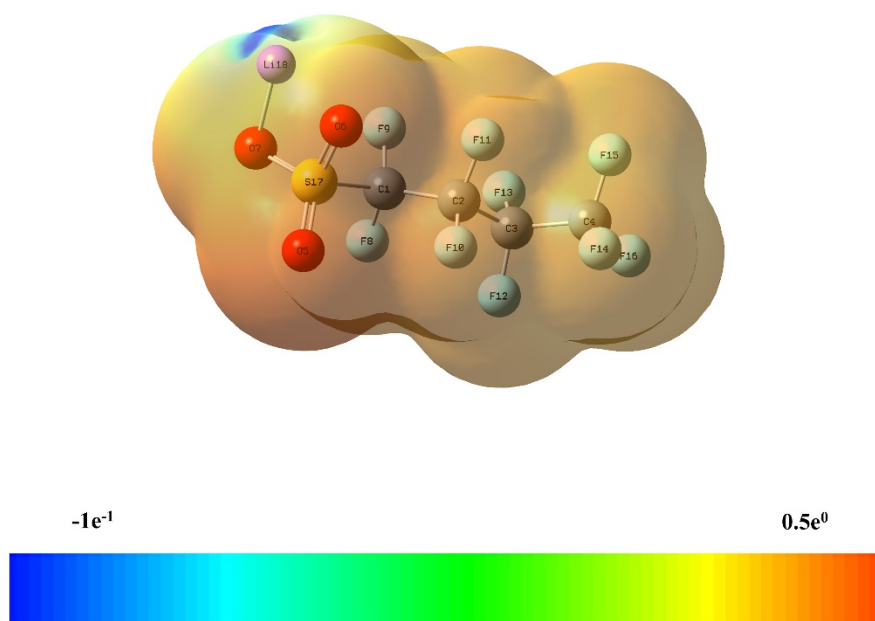

**Figure S1.** Electron cloud density distribution of NFSALi.

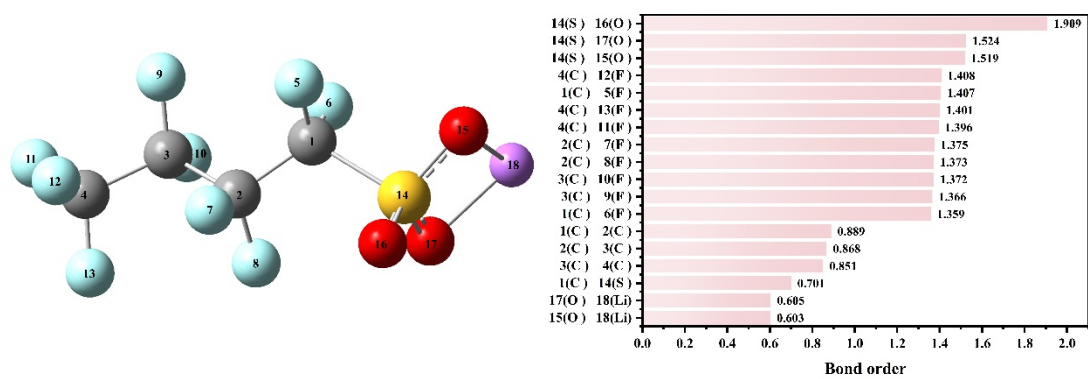

**Figure S2.** Bond order of NFSALi

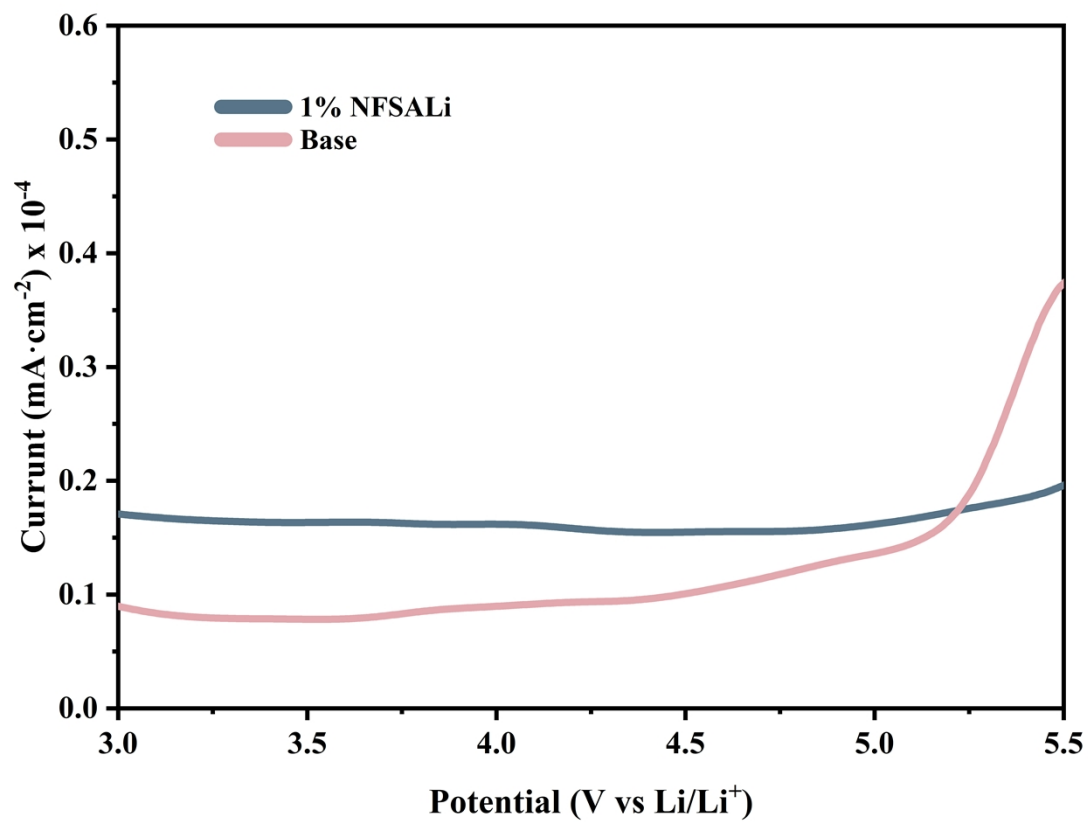

**Figure S3.** Oxidation potential by LSV with steel foil as work electrode, Li foil as counter- and reference electrodes at a scanning rate of 1 mV s<sup>-1</sup>.

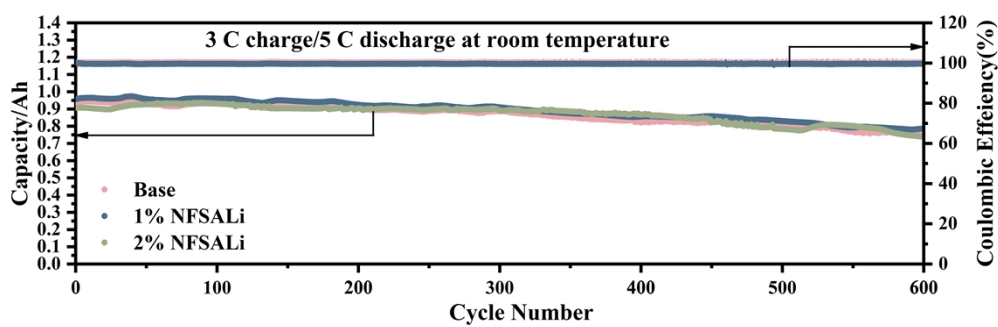

**Figure S4.** Cycling performance under 3 C charge/5 C discharge rate at room temperature.

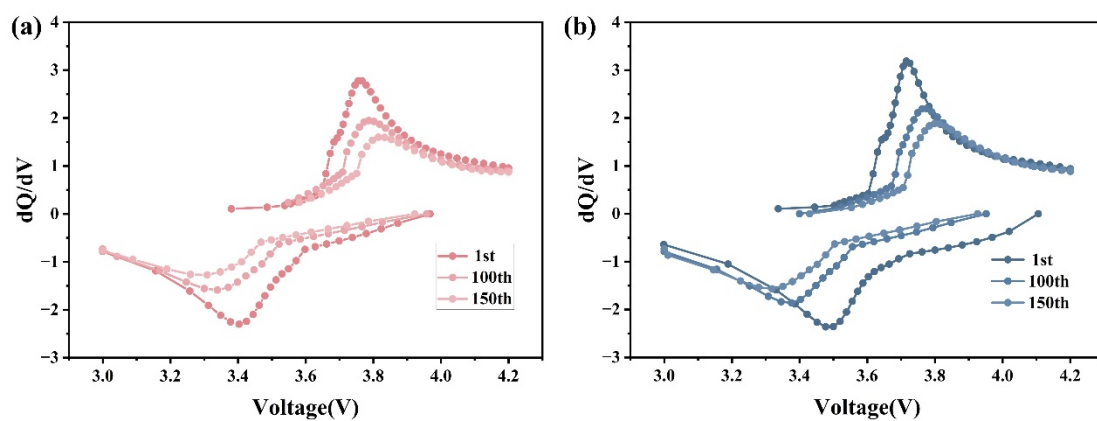

**Figure S5.** The  $dQ/dV$  curves of various electrolytes with different cycles at 55 °C, (a) base electrolyte, (b) 1% NFSALi electrolyte.

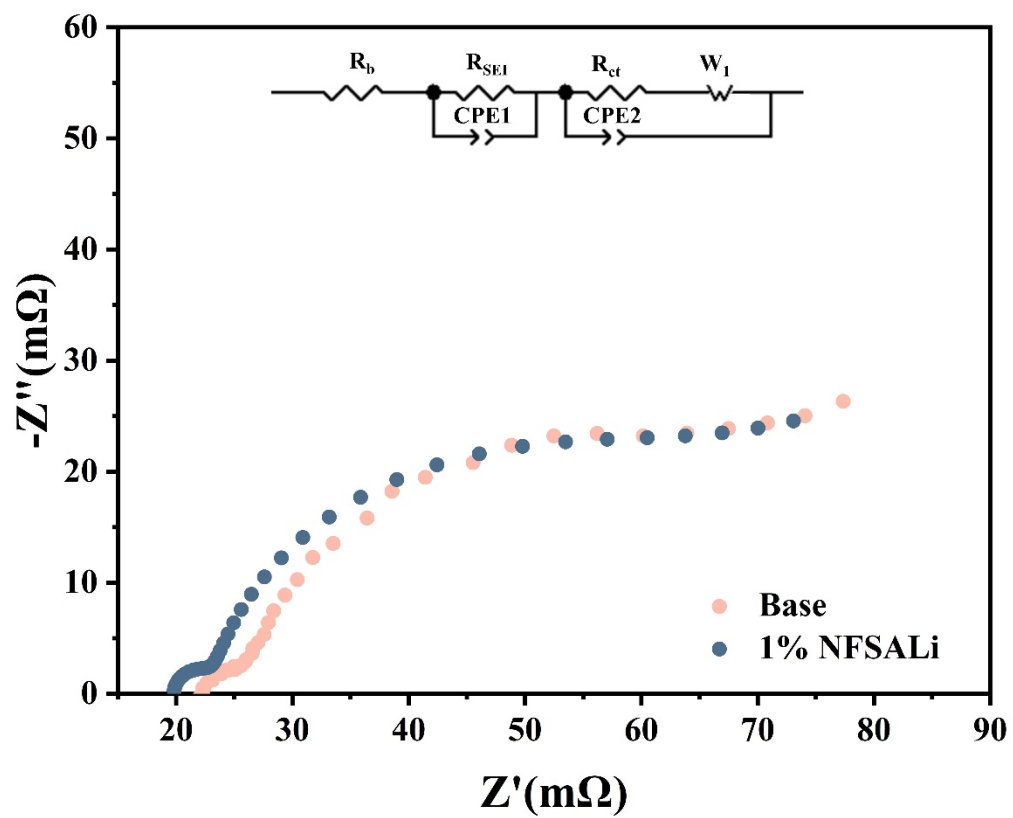

**Figure S6.** The electrochemical impedance spectroscopy (EIS) of each electrolyte before cycling.

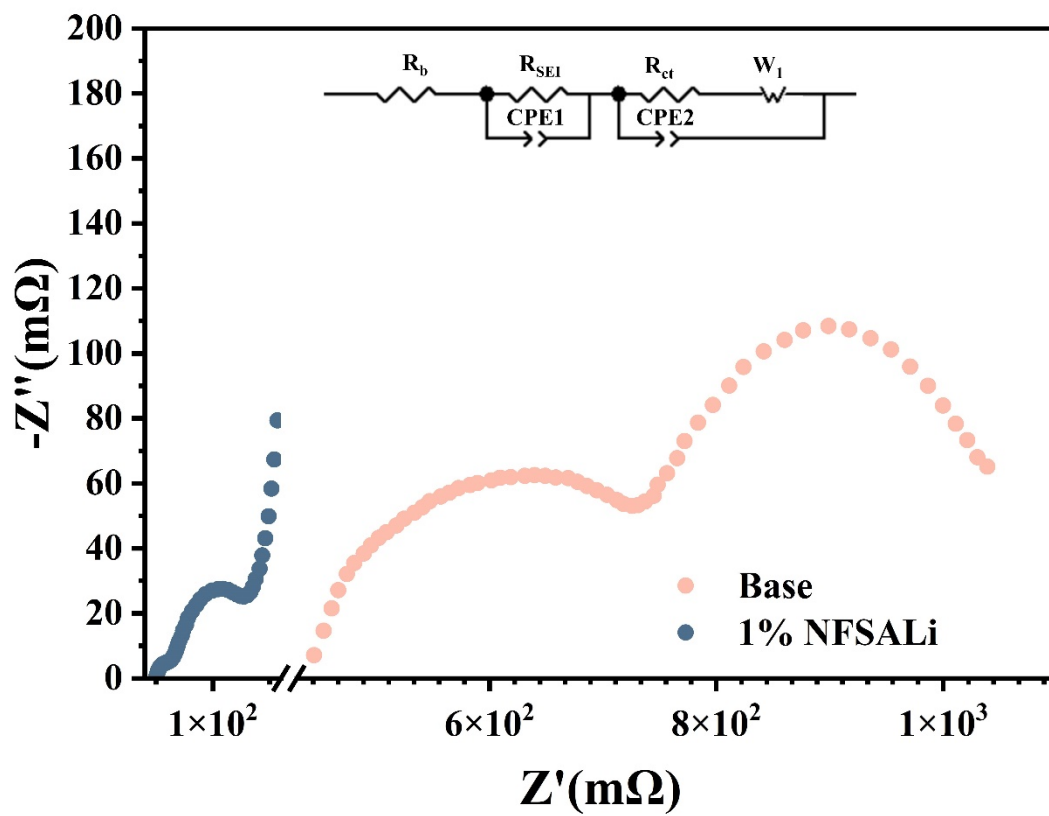

**Figure S7.** The electrochemical impedance spectroscopy (EIS) of each electrolyte after cycling at 55 °C.



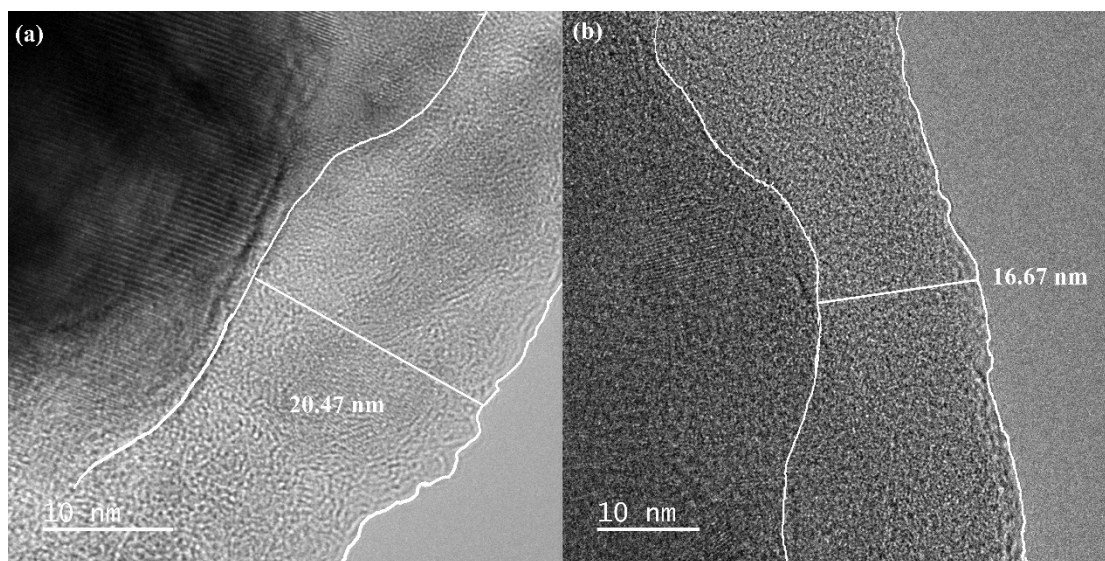

**Figure S8.** Transmission Electron Microscope (TEM) image of the NCM523 electrodes: (a) base electrolyte after 200 cycles at 55 °C, (b) 1% NFSALi electrolyte after 200 cycles at 55 °C.

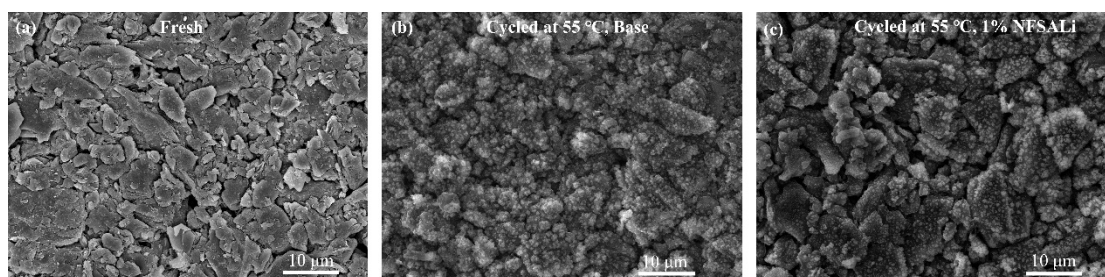

**Figure S9.** Surficial SEM images of graphite electrodes: (a) fresh, (b) after 200 cycles at 55 °C with base electrolyte, (c) after 200 cycles at 55 °C with 1% NFSALi electrolyte.

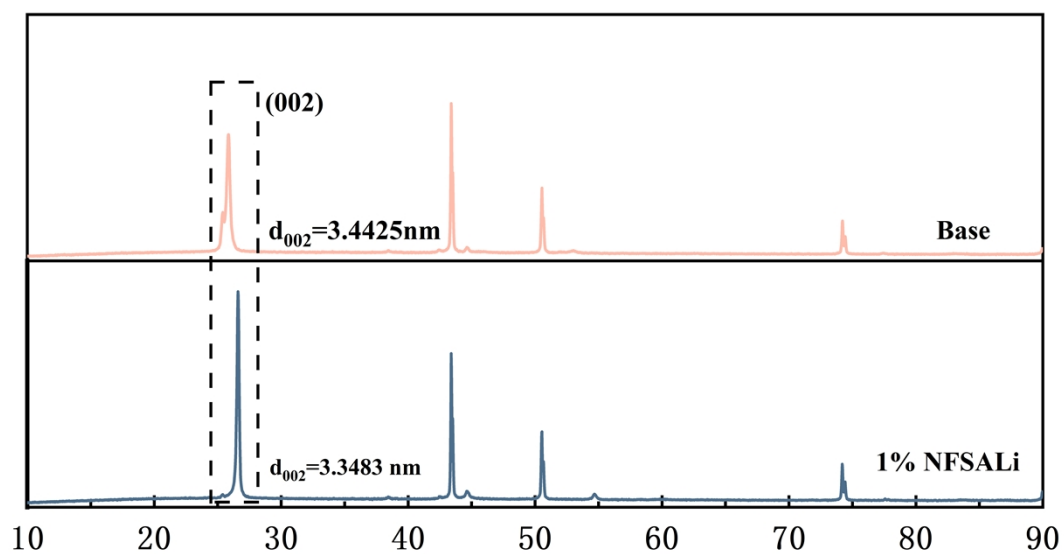

**Figure S10.** XRD patterns of graphite electrodes after cycling at 55 °C in base electrolyte and NFSALi containing electrolyte.

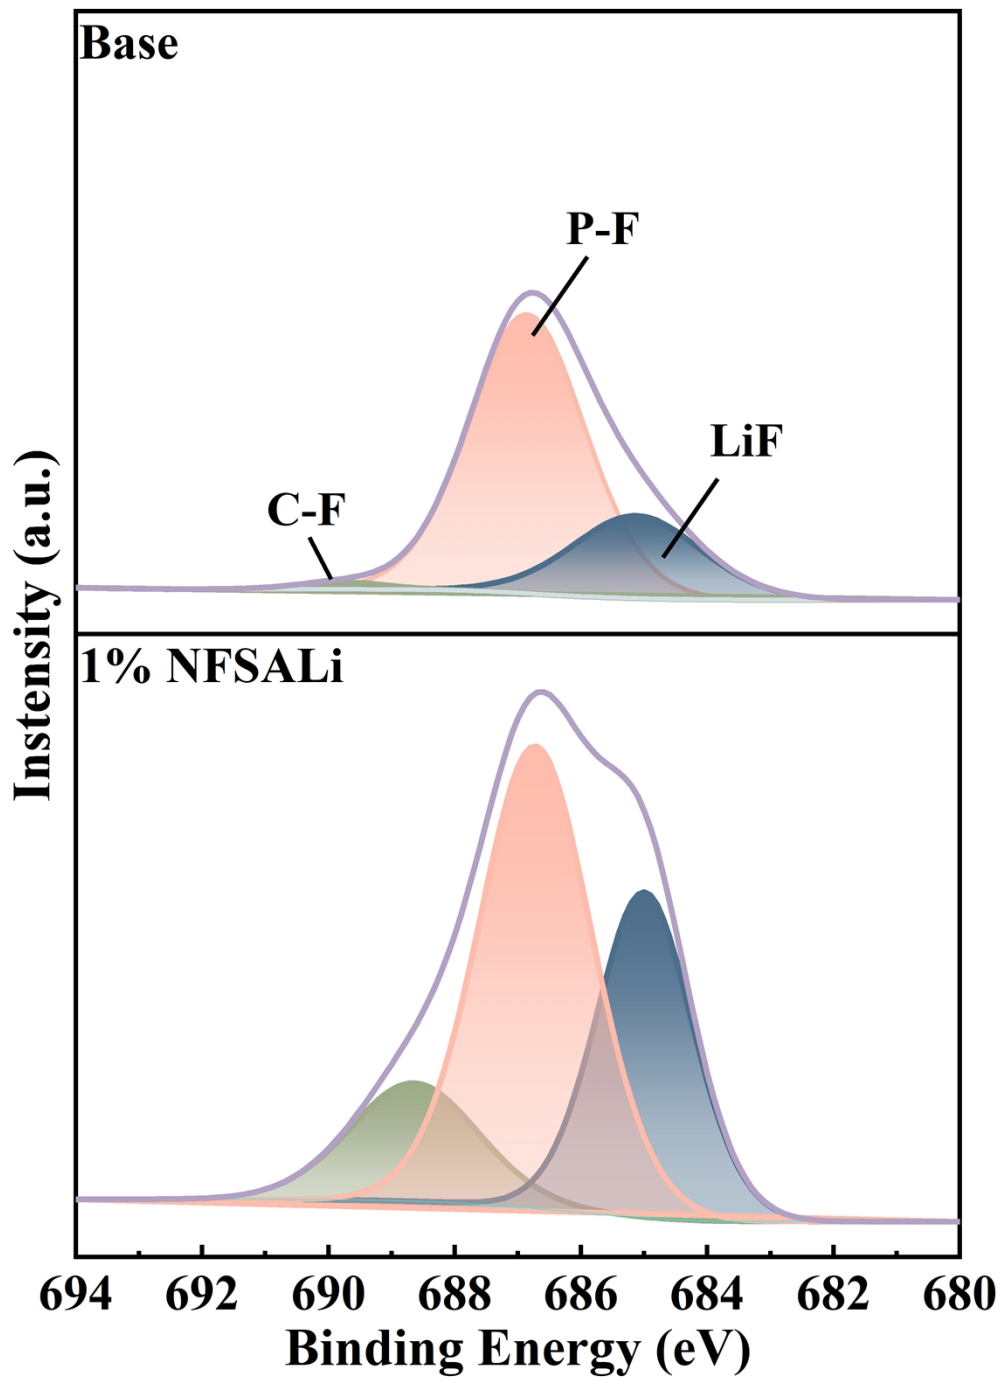

**Figure S11** The X-ray photoelectron spectroscopy (XPS) analysis of the NCM523 electrodes: F 1s spectra after cycling.

**Table S1** Atomic concentration (%) of NCM523 electrodes after 200 cycles.

| Regions | Component | Base  | 1% NFSALi |
|---------|-----------|-------|-----------|
| F 1s    | P-F       | 74.17 | 31.63     |
|         | C-F       | 1.47  | 15.41     |
|         | LiF       | 24.36 | 31.63     |

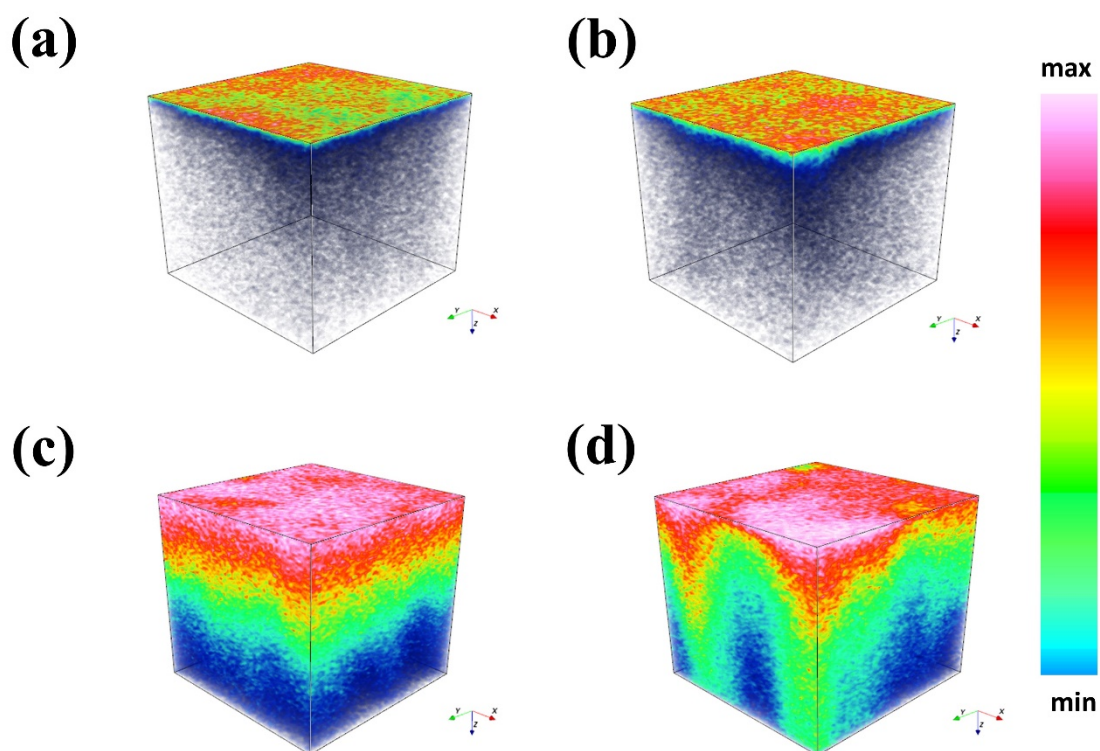

**Figure S12.** 3D render of  $\text{PO}_2^-$ :(a) base electrolyte, (b) 1% NFSALi electrolyte, (c) base electrolyte after 200 cycles at 55 °C, (d) 1% NFSALi electrolyte after 200 cycles at 55 °C.
